# Supplementary material for: Occurrence of Eimeria Species (Apicomplexa: Eimeriidae) in Domestic Rabbits (Oryctolagus Cuniculus) in Qena Governorate, Upper Egypt, with a Special Key
Source: Research Square preprint supplement (doi:10.21203/rs.3.rs-927932/v1), 2021-10-20
Supplement: Supplementary file 1 [file ea48c8e09a1a0c64957c2421.docx]

| **Table (2): Comparative morphological and morphometric characteristics of unsporulated oocysts of *Eimeria* species from domestic rabbits in the present study with that previously described.** | ***E. media*** | **Present study** | 26.45 (25.68-27.14) | 16.94 (16.73-17.24) | + | Ellipsoid | 18.63 (18.26-18.98) | 13.78 (13.5-14.04) | Upper Egypt |
| --- | --- | --- | --- | --- | --- | --- | --- | --- | --- |
| **Li et al., 2016** | 30.62 | 18.35 | + | Ellipsoid-ovoid | -------- | -------- | China |
| ***E. magna*** | **Present study** | 30.2 (29.74-30.87) | 18.8 (17.89-19.32) | + | Ellipsoid | 19.09 (18.72-14.07) | 15.05 (13.94-16.64) | Upper Egypt |
| **Li et al., 2016** | 33.24 | 17.92 | + | Ovoid | -------- | -------- | China |
| ***E. irresidua*** | **Present study** | 29.08 (28.28-29.53) | 17.87 (17.53-18.11) | + | Ellipsoid | 17.81 (17.75-17.87) | 14.76 (14.32-15.01) | Upper Egypt |
| ***E. flavescens*** | **Present study** | (25.25-29.79) | 20.25 (18.54-21.86) | + | Ovoid | 18.78 (17.67-20.43) | 16.6 (14.33-18.7) | Upper Egypt |
| **Li et al., 2016** | 24.82 | 16.05 | + | Pyriform | -------- | -------- | China |
| ***E. exigua*** | **Present study** | 22.74 (20.48-25.41) | 21.96 (20.61-23.88) | - | Spherical | 14.58 (11.96-18.12) | 13.9 (11.5-17.25) | Upper Egypt |
| **Li et al., 2016** | 13.66 | 12.82 | - | Spherical-subspherical | -------- | -------- | China |
| ***E. coecicola*** | **Present study** | 30.3 (29.52-31.22) | 16.32 (15.43-16.88) | + | Cylindrical | 22.54 (19.37-24.7) | 12.07 (11.64-12.54) | Upper Egypt |
| **Li et al., 2016** | 29.11 | 15.55 | + | Elongate-ovoid | -------- | -------- | China |
| **Species** | **Reference** | Length | Width | Micropyle | Shape | Length | Width | Locality |
| Oocyst | | | | Sporoblast (Zygote) |  |

| **Table (2): Continued** | ***E. piriformis*** | **Present study** | 25.68 (24.35-26.83) | 20.12 (18.58-21.13) | + | Pyriform | 15.44 (14.32-16.14) | 13.87 (13.05-14.53) | Upper Egypt |
| --- | --- | --- | --- | --- | --- | --- | --- | --- | --- |
| **Li et al., 2016** | 26.72 | 16.96 | + | Piriform | -------- | -------- | China |
| ***E. vejdoveskyi*** | **Present study** | 29.97 (29.56-30.58) | 18.14 (17.93-18.54) | + | Spherical | 15.14 (15.04-15.36) | 16.22 (15.99-16.61) | Upper Egypt |
| **Li et al., 2016** | 29.11 | 15.55 | + | Elongate-ovoid | -------- | -------- | China |
| ***E. stiedai*** | **Present study** | 27.31 (26.58-27.74) | 17.37 (16.74-17.86) | + | Ovoid | 17.05 (16.55-17.38) | 15.24 (14.88-15.46) | Upper Egypt |
| **Li et al., 2016** | 30.14 | 18.32 | + | Ellipsoid | -------- | -------- | China |
| ***E. intestinalis*** | **Present study** | 23.9 (20.97-25.92) | 16.83 (13.71-20.34) | + | Pyriform | 15.22 (14.85-15.8) | 14.31  (11.87-16.57) | Upper Egypt |
| **Li et al., 2016** | 26.72 | 16.96 | + | Piriform | -------- | -------- | China |
| ***E. perforans*** | **Present study** | 19.56 (15.25-22.96) | 14.08 (11.64-16.72) | - | Ellipsoid | 13.5 (11.63-15.19) | 9.56 (7.9-10.63) | Upper Egypt |
| **Li et al., 2016** | 20.26 | 12.09 | - | Ellipsoid-subrectangular | -------- | -------- | China |
| **Species** | **Reference** | Length | Width | Micropyle | Shape | Length | Width | Locality |
| Oocyst | | | | Sporoblast (Zygote) | |
